# Supplementary material for: Study of the microscopic mechanism of stepwise charge injection in co-sensitive DSSCs in the framework of a D–π–A dye and chlorophyll
Source: Royal Society of Chemistry journal article supplement (doi:10.1039/d3cp03664b), 2023-12-19
Supplement: d3cp03664b1.pdf [file d3cp03664b1.pdf]

**Theoretical Background.** The chemical reaction parameters can be obtained from the following formula [1-3]:

$$IP = E_+ - E_0 \quad (1)$$

$$EA = E_0 - E_- \quad (2)$$

$$h = \frac{IP - EA}{2} \quad (3)$$

$$W = \frac{(IP + EA)^2}{4(IP - EA)} \quad (4)$$

$$W^+ = \frac{(IP + 3EA)^2}{16(IP - EA)} \quad (5)$$

Where  $E_+$  is the energy of the cation, and  $E_-$  is the energy of the anion, and  $E_0$  is the energy calculated from the optimized structure of the neutral molecule.

The intramolecular charge transfer characteristics can be obtained from the following formula [4-6]:

$$D_{ct} = \sqrt{D_X^2 + D_Y^2 + D_Z^2} \quad (6)$$

$$\Delta q = \int \rho_+(r) dr = \int \rho_-(r) dr \quad (7)$$

Where  $D_{ct}$  is the charge transfer distance, and  $D_X$ ,  $D_Y$ ,  $D_Z$  represent the distance in three different directions; the overlap condition,  $\rho_+(r)$  and  $\rho_-(r)$  are increment and depletion of the density.

The essence of the nonlinear optics (NLO) property is to describe the response of a system in an applied electric field, which in turn affects intramolecular charge delocalization based upon asymmetric polarization caused by the donor and receptor segments in  $\pi$ -conjugated molecules, The molecular polarizability is calculated by Taylor expansion of energy  $E$  to uniform external electric field  $F$ :

$$\begin{aligned} E(F) &= E(0) + \frac{\partial E}{\partial F} \Big|_{F=0} F + \frac{1}{2} \frac{\partial^2 E}{\partial F^2} \Big|_{F=0} F^2 + \frac{1}{6} \frac{\partial^3 E}{\partial F^3} \Big|_{F=0} F^3 + \dots \\ &= E(0) - \mu_0 F - \frac{1}{2} \alpha F^2 - \frac{1}{6} \beta F^3 - \dots \end{aligned} \quad (8)$$

$$\alpha = -\frac{\partial^2 E}{\partial F^2} \Big|_{F=0} \quad (9)$$

$$\beta = -\frac{\partial^3 E}{\partial F^3} \Big|_{F=0} \quad (10)$$

$\mu_0$  is the vector of the molecule's permanent dipole moment (the dipole moment in the absence of an external field).  $\alpha$  is the molecular polarizability, also known as the linear optical coefficient.  $\beta$  is the first hyperpolarizability, or the NLO coefficient of the molecule. The polarizability is calculated by the following formula [7]:

$$\alpha = (\alpha_{xx} + \alpha_{yy} + \alpha_{zz}) / 3 \quad (11)$$

Where  $\alpha_{xx}$ ,  $\alpha_{yy}$ , and  $\alpha_{zz}$  denote the tensor components of polarizability, respectively. The tensor of the  $\beta$  represents a result of the third derivative of the energy, which is written as [8]:

$$\beta_{tot} = \sqrt{(\beta_{xxx} + \beta_{xyy} + \beta_{xzz})^2 + (\beta_{yyy} + \beta_{xxy} + \beta_{yzz})^2 + (\beta_{zzz} + \beta_{xxz} + \beta_{yyz})^2} \quad (12)$$

The electron injection driving force and electron regeneration driving force are obtained from the following formula [9-10]:

$$\Delta G^{inject} = E_{CB} - E_{OX}^* = E_{CB} - E_{OX} - E_{00} \quad (13)$$

$$\Delta G^{reg} = E_{redox} - E_{OX} \quad (14)$$

Here,  $E_{CB}$  refers to the  $\text{TiO}_2$  CB lying at -4.0 eV, and  $E_{OX}$  and  $E_{OX}^*$  represent the dye oxidation potential in its ground state and excited state, respectively, and  $E_{00}$  refers to the vertical transition energy.  $E_{redox}$  is the Fermi levels of electrolyte iodine/iodide. According to Koopman's theorem,  $E_{OX}$  can be calculated by taking negative of the dye HOMO.

$$\lambda_h = (E_0^+ - E_+) + (E_+^0 - E_0) \quad (15)$$

$$\lambda_e = (E_0^- - E_-) + (E_-^0 - E_0) \quad (16)$$

$$\lambda_{tot} = \lambda_h + \lambda_e \quad (17)$$

Here,  $E_0$ , the neutral molecule's energy in the ground state;  $E_+/E_-$ , the energy of the cationic (anionic) optimized under the cationic (anionic) structure;  $E_+^0/E_-^0$ , the cation (anion)'s energy with the geometry of the neutral molecule;  $E_0^+/E_0^-$ , the

neutral's energy with the geometry of the cationic (anionic) state [11].

The Newns-Anderson method was adopted to simulate the mixing of the lowest unoccupied molecular orbital (LUMO) on dye with the manifold virtual orbitals on TiO<sub>2</sub>. The simulation was based on the shift in energy of the LUMO after grafting the TiO<sub>2</sub> surface and broadening width ( $\hbar\Gamma$ ), which is defined by the Lorentzian distribution [12]:

$$L_{LUMO}(E) = \frac{1}{(E - E_{LUMO(ads)})^2 + \left(\frac{\hbar\Gamma}{2}\right)^2} \quad (18)$$

The broadening width  $\hbar\Gamma$  is derived from the mean deviation of the LUMO (adsorbate) levels, which is evaluated as follows [13]:

$$\hbar\Gamma = \sum_i p_i |\varepsilon_i - E_{LUMO(ads)}| \quad (19)$$

$$\tau(fs) = \frac{658}{\hbar\Gamma} \quad (20)$$

where  $p_i$  and  $\varepsilon_i$  are the adsorbed portion of the  $i$ th molecular orbital and its corresponding orbital energy, respectively.

The above content has been added to the supporting documents.

## Reference:

1. Tomás DM, Jesús BL, Rody SR, Daniel GM, Claudia D, Alessia C. Theoretical Study of the Effect of pi-Bridge on Optical and Electronic Properties of Carbazole-Based Sensitizers for DSSCs. *Molecules* **2020**, 25(16): 3670.
2. Zhang G, Musgrave CB. Comparison of DFT methods for molecular orbital eigenvalue calculations. *Journal of Physical Chemistry A* **2007**, 111(8): 1554-1561.
3. Singh M, Kanaparthi RK. Theoretical exploration of 1,3-Indanedione as electron acceptor-cum-anchoring group for designing sensitizers towards DSSC applications. *Solar Energy* **2022**, 273: 456-469.
4. Mandal S, Kandregula GR, Ramanujam K. Replacing aromatic pi-system with cycloalkyl in triphenylamine dyes to impact intramolecular charge transfer in dyes pertaining to dye-sensitized solar cells application. *Journal of Photochemistry and Photobiology A-Chemistry* **2020**, 403: 112862.
5. DeSousa S, Lyu S, Ducasse L, Toupance T, Olivier C. Tuning visible-light absorption properties of Ru-diacetylide complexes: simple access to colorful efficient dyes for DSSCs. *Journal of Materials Chemistry A*, **2015**, 35: 18256-18264.
6. Stein T, Kronik L, Baer R. Reliable prediction of charge transfer excitations in molecular complexes using time-dependent density functional theory. *Journal of the American Chemical Society* **2009**, 131: 2818.

7. Senge MO, Fazekas M, Notaras EGA, Blau WJ, Zawadzka M, Locos OB, Mhuircheartaigh EMN. Nonlinear optical properties of porphyrins. *Advanced Materials* **2007**, 19: 2737-2774.
8. Patil DS, Avhad KC, Sekar N. Linear correlation between DSSC efficiency, intramolecular charge transfer characteristics, and NLO properties-DFT approach. *Computational and Theoretical Chemistry* **2018**, 1138: 75-83.
9. Li W, Wang J, Chen J, Bai FQ. Theoretical investigation and design of high-efficiency dithiafulvenyl-based sensitizers for dye-sensitized solar cells: the impacts of elongating  $\pi$ -spacers and rigidifying dithiophene. *Physical chemistry chemical physics* **2014**, 16(20): 9458-68.
10. Ashraful I, Hideki S, Hironori A. Molecular design of ruthenium(II) polypyridyl photosensitizers for efficient nanocrystalline TiO<sub>2</sub> solar cells. *Journal of Photochemistry & Photobiology, A: Chemistry* **2003**, 158(2): 131-138.
11. Wang HB, Zhao DP, Song P, Ma FC, Li YZ. Effect of charge transport channel and interaction of IDT type dyes on photoelectric characteristics. *Journal of Molecular Liquids* **2020**, 303: 112594.
12. Muscat JP, Newns DM. Chemisorption on metals. *Progress in Surface Science* **1978**, 9, 1.
13. El-Meligy AB, Koga N, Iuchi S, Yoshida K, Hirao K, Mangood AH, El-Nahas AM. DFT/TD-DFT Calculations of the Electronic and Optical Properties of Bis-N, N-Dimethylaniline-Based Dyes for Use in Dye-Sensitized Solar Cells. *Journal of Photochemistry & Photobiology, A: Chemistry* **2018**, 367: 332-346.

**Table S1.** The polarizability of the dye (a. u.).

| <b>Dye</b> | <b><math>\alpha_{xx}</math></b> | <b><math>\alpha_{xy}</math></b> | <b><math>\alpha_{yy}</math></b> | <b><math>\alpha_{xz}</math></b> | <b><math>\alpha_{yz}</math></b> | <b><math>\alpha_{zz}</math></b> | <b><math>\alpha</math></b> |
|------------|---------------------------------|---------------------------------|---------------------------------|---------------------------------|---------------------------------|---------------------------------|----------------------------|
| TY6        | 1601                            | 16                              | 656                             | 12                              | 164                             | 745                             | 1001                       |
| CXC22      | 2614                            | -6                              | 689                             | 26                              | 59                              | 1154                            | 1486                       |
| CHL7       | 1193                            | -98                             | 1062                            | -128                            | -27                             | 329                             | 861                        |

**Table S2.** Hyperpolarizabilities of three dyes (a.u).

| Dye   | $\beta_{xxx}$ | $\beta_{xyy}$ | $\beta_{xzz}$ | $\beta_{yyy}$ | $\beta_{xyx}$ | $\beta_{yzz}$ | $\beta_{zzz}$ | $\beta_{xxz}$ | $\beta_{yyz}$ | $B_{tot}$ |
|-------|---------------|---------------|---------------|---------------|---------------|---------------|---------------|---------------|---------------|-----------|
| TY6   | 100684        | 1083          | 495           | 55            | 625           | -470          | -58           | 611           | -122          | 101795    |
| CXC22 | 204765        | 786           | 754           | 53            | 2415          | -396          | 27            | 929           | 35            | 206449    |
| CHL7  | 1207          | 3689          | 212           | -2493         | -505          | -903          | 230           | 37            | 108           | 1419      |

**Table S3.** Excited states information of three co-sensitive configurations.

| Dye | State | E(ev) | $\lambda_{\max}$ (nm) | f     | CI (main)      |
|-----|-------|-------|-----------------------|-------|----------------|
| H-H | S1    | 2.10  | 589.89                | 0.187 | H-1→L+1 (0.63) |
|     | S2    | 2.25  | 549.84                | 1.830 | H→L (0.61)     |
|     | S3    | 2.45  | 505.76                | 0.035 | H-2→L+1 (0.58) |
|     | S4    | 2.71  | 456.32                | 0.052 | H-2→L (0.50)   |
|     | S5    | 2.85  | 433.77                | 0.010 | H-1→L (0.66)   |
|     | S6    | 3.13  | 395.66                | 0.003 | H-2→L (0.64)   |
|     | S7    | 3.13  | 395.01                | 0.009 | H→L+1 (0.57)   |
|     | S8    | 3.18  | 389.06                | 0.047 | H-4→L (0.41)   |
|     | S9    | 3.32  | 372.49                | 0.730 | H-1→L+3 (0.49) |
|     | S10   | 3.36  | 368.57                | 0.156 | H-4→L (0.37)   |
|     | S11   | 3.42  | 362.30                | 0.629 | H-2→L+3 (0.52) |
|     | S12   | 3.54  | 349.33                | 1.145 | H-5→L (0.33)   |
| H-T | S1    | 2.10  | 588.51                | 0.186 | H-1→L+1 (0.63) |
|     | S2    | 2.26  | 547.74                | 1.722 | H→L (0.60)     |
|     | S3    | 2.45  | 505.56                | 0.041 | H-2→L+1 (0.58) |
|     | S4    | 2.71  | 456.97                | 0.066 | H-2→L (0.50)   |
|     | S5    | 3.05  | 406.27                | 0.010 | H-1→L (0.67)   |
|     | S6    | 3.19  | 387.64                | 0.027 | H-4→L (0.41)   |
|     | S7    | 3.27  | 378.12                | 0.000 | H→L+1 (0.61)   |
|     | S8    | 3.29  | 375.87                | 0.001 | H-2→L (0.67)   |
|     | S9    | 3.34  | 370.81                | 0.746 | H-1→L+3 (0.47) |
|     | S10   | 3.35  | 369.41                | 0.382 | H-4→L (0.34)   |
|     | S11   | 3.42  | 361.52                | 0.633 | H-2→L+3 (0.53) |
|     | S12   | 3.53  | 350.68                | 1.012 | H-5→L (0.33)   |
| S-S | S1    | 2.10  | 589.15                | 0.273 | H-1→L+1 (0.63) |
|     | S2    | 2.25  | 548.63                | 1.917 | H→L (0.60)     |
|     | S3    | 2.45  | 504.59                | 0.040 | H-3→L+1 (0.59) |
|     | S4    | 2.71  | 456.04                | 0.104 | H-2→L (0.50)   |
|     | S5    | 3.19  | 387.61                | 0.011 | H-4→L (0.41)   |
|     | S6    | 3.34  | 370.95                | 0.055 | H-4→L (0.35)   |
|     | S7    | 3.35  | 369.32                | 1.462 | H-1→L+3 (0.57) |
|     | S8    | 3.44  | 360.02                | 1.194 | H-2→L+3 (0.57) |
|     | S9    | 3.51  | 353.08                | 0.359 | H-5→L (0.35)   |
|     | S10   | 3.69  | 335.19                | 0.287 | H-7→L+1 (0.62) |
|     | S11   | 3.75  | 330.28                | 0.000 | H-1→L (0.70)   |
|     | S12   | 3.84  | 322.62                | 0.000 | H→L+1 (0.69)   |

**Table S4.** The charge and hole contents are distributed in different parts of the three co-sensitive configurations (where D represents the CXC22 donor, P represents the CXC22 conjugate bridge, and A represents the CXC22 receptor).

| Type | State | D      | P      | A     | CHL     | D        | P      | A      | CHL    |
|------|-------|--------|--------|-------|---------|----------|--------|--------|--------|
|      |       | Hole   |        |       |         | Electron |        |        |        |
| H-H  | S1    | 0.11%  | 0.08%  | 0.05% | 99.76%  | 0.01%    | 0.34%  | 0.20%  | 99.45% |
|      | S2    | 11.83% | 79.51% | 8.49% | 0.17%   | 1.72%    | 87.96% | 9.80%  | 0.51%  |
|      | S3    | 0.05%  | 0.06%  | 0.07% | 98.82%  | 0.01%    | 0.32%  | 0.18%  | 99.49% |
|      | S4    | 42.83% | 47.28% | 7.83% | 1.06%   | 1.97%    | 88.21% | 9.42%  | 0.40%  |
|      | S5    | 0.14%  | 0.08%  | 0.04% | 99.73%  | 0.35%    | 62.22% | 36.85% | 0.58%  |
| H-T  | S1    | 0.02%  | 0.01%  | 0.05% | 99.91%  | 0.00%    | 0.04%  | 0.09%  | 99.87% |
|      | S2    | 16.20% | 75.75% | 7.92% | 0.13%   | 1.59%    | 85.09% | 13.22% | 0.10%  |
|      | S3    | 0.04%  | 0.04%  | 0.13% | 99.80%  | 0.00%    | 0.06%  | 0.08%  | 99.86% |
|      | S4    | 46.75% | 45.82% | 7.30% | 0.13%   | 2.07%    | 90.03% | 7.77%  | 0.13%  |
|      | S5    | 0.01%  | 0.01%  | 0.03% | 99.96%  | 0.39%    | 66.77% | 33.72% | 0.13%  |
| S-S  | S1    | 0.00%  | 0.00%  | 0.00% | 100.00% | 0.00%    | 0.00%  | 0.01%  | 99.99% |
|      | S2    | 11.97% | 79.75% | 8.28% | 0.00%   | 1.71%    | 87.99% | 10.29% | 0.01%  |
|      | S3    | 0.00%  | 0.00%  | 0.00% | 100.00% | 0.00%    | 0.00%  | 0.01%  | 99.99% |
|      | S4    | 45.95% | 46.73% | 7.31% | 0.00%   | 2.09%    | 89.75% | 8.16%  | 0.00%  |
|      | S5    | 25.12% | 71.85% | 3.03% | 0.00%   | 2.86%    | 86.70% | 10.43% | 0.00%  |



**Table S5.** The amount of intermolecular charge transfer in the first five excited states of the three configurations (where D represents the CXC22 donor, P represents the CXC22 conjugate bridge, and A represents the CXC22 receptor).

| Typ | State | D        | P       | A        | CHL      | Net charge |
|-----|-------|----------|---------|----------|----------|------------|
|     | e     |          |         |          |          |            |
| H-H | S1    | -0.00108 | 0.00265 | 0.00149  | -0.00306 | -0.00306   |
|     | S2    | -0.10104 | 0.08447 | 0.01313  | 0.00344  | 0.00344    |
|     | S3    | -0.00048 | 0.00259 | 0.00116  | -0.00327 | -0.00327   |
|     | S4    | -0.41859 | 0.40930 | 0.01590  | -0.00660 | -0.00660   |
|     | S5    | 0.00217  | 0.62134 | 0.36802  | -0.99153 | -0.99153   |
| H-T | S1    | -0.00016 | 0.00030 | 0.00035  | -0.00049 | -0.00049   |
|     | S2    | -0.14610 | 0.09342 | 0.05296  | -0.00027 | -0.00027   |
|     | S3    | -0.00035 | 0.00022 | -0.00047 | 0.00060  | 0.00060    |
|     | S4    | -0.44680 | 0.44207 | 0.00472  | 0.0001   | 0.00001    |
|     | S5    | 0.00379  | 0.63760 | 0.35691  | -0.99830 | -0.99830   |
| S-S | S1    | 0.00000  | 0.00004 | 0.00004  | -0.00008 | -0.0008    |
|     | S2    | -0.10256 | 0.08243 | 0.02007  | 0.00006  | 0.0006     |
|     | S3    | 0.00000  | 0.00004 | 0.00003  | -0.00006 | -0.0006    |
|     | S4    | -0.43868 | 0.43021 | 0.00843  | 0.0004   | 0.00004    |
|     | S5    | -0.22256 | 0.14849 | 0.07402  | 0.00005  | 0.00005    |

**Table S6.** D/A Interfaces critical parameters (transition dipole moment ( $\mu_{tr}$ ), dipole moment difference ( $\Delta\mu$ ), electronic coupling ( $V_{DA}$ ), reorganization energy  $\lambda_{in}$  and  $\lambda$  (eV), Gibbs Free Energy change  $\Delta G_{CR}$  (eV), Gibbs Free Energy charge in Charge separation  $\Delta G_{CS}$  (eV), charge recombination rate  $K_{CR}$  ( $s^{-1}$ ) and charge separation rate  $K_{CS}$  ( $s^{-1}$ )).

| $\mu_{tr}$ | $\Delta\mu$ | $V_{DA}$ | $\lambda_{in}$ | $\lambda$ | $\Delta G_{CR}$ | $\Delta G_{CS}$ | $\Delta K_{CR}$ | $\Delta K_{CS}$    |
|------------|-------------|----------|----------------|-----------|-----------------|-----------------|-----------------|--------------------|
| 0.058      | 0.107       | 0.039    | 0.278          | 0.578     | -2.07           | -1.26           | 6.28            | $2.48 \times 10^8$ |

**Figure captions:**

**Figure S1.** The partial density of states of investigated dye/TiO<sub>2</sub> complexes.

**Figure S2.** The head-to-head (H-H), head-to-toe (H-T) and side-by-side type (S-S) configuration of the co-sensitization system.

**Figure S3.** Absorption spectra of three co-sensitive configurations.

**Figure S4.** CDD diagram of dye co-sensitized adsorption on TiO<sub>2</sub>.

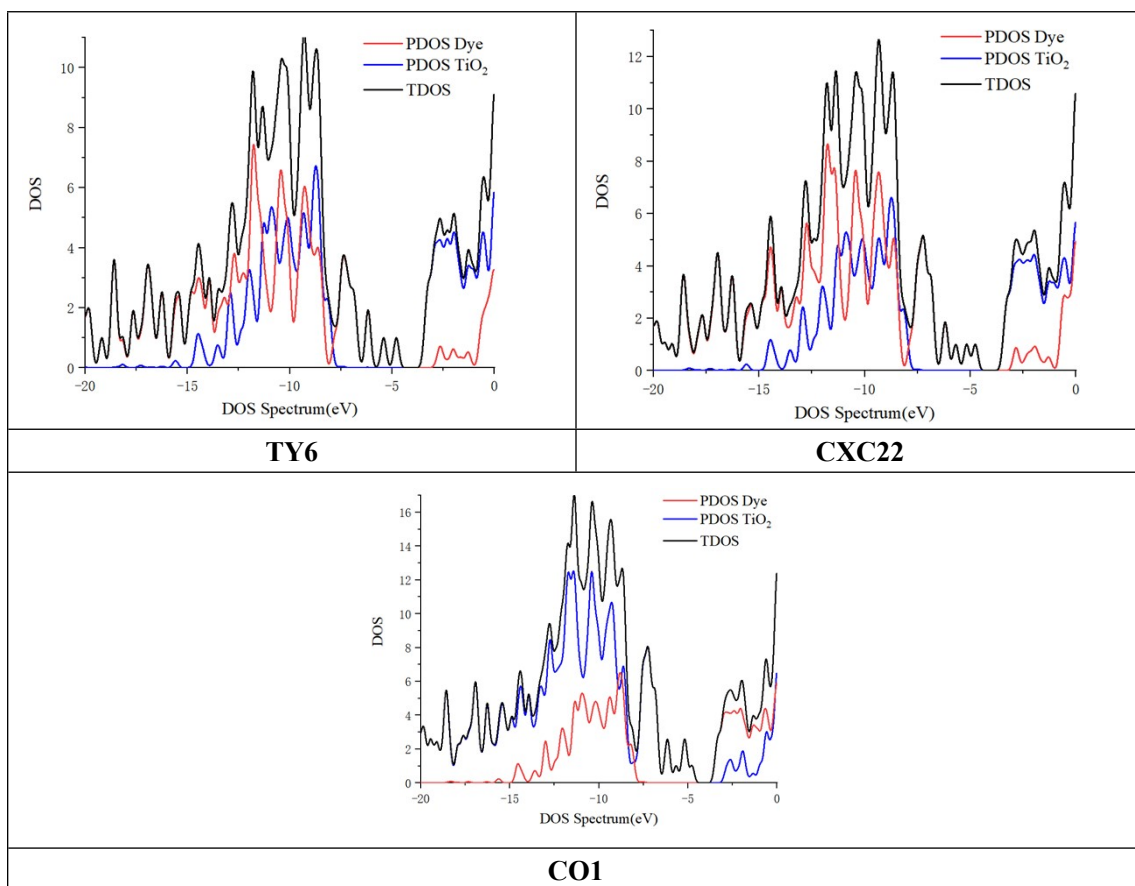

**Figure S1.** The partial density of states of investigated dye/TiO<sub>2</sub> complexes.

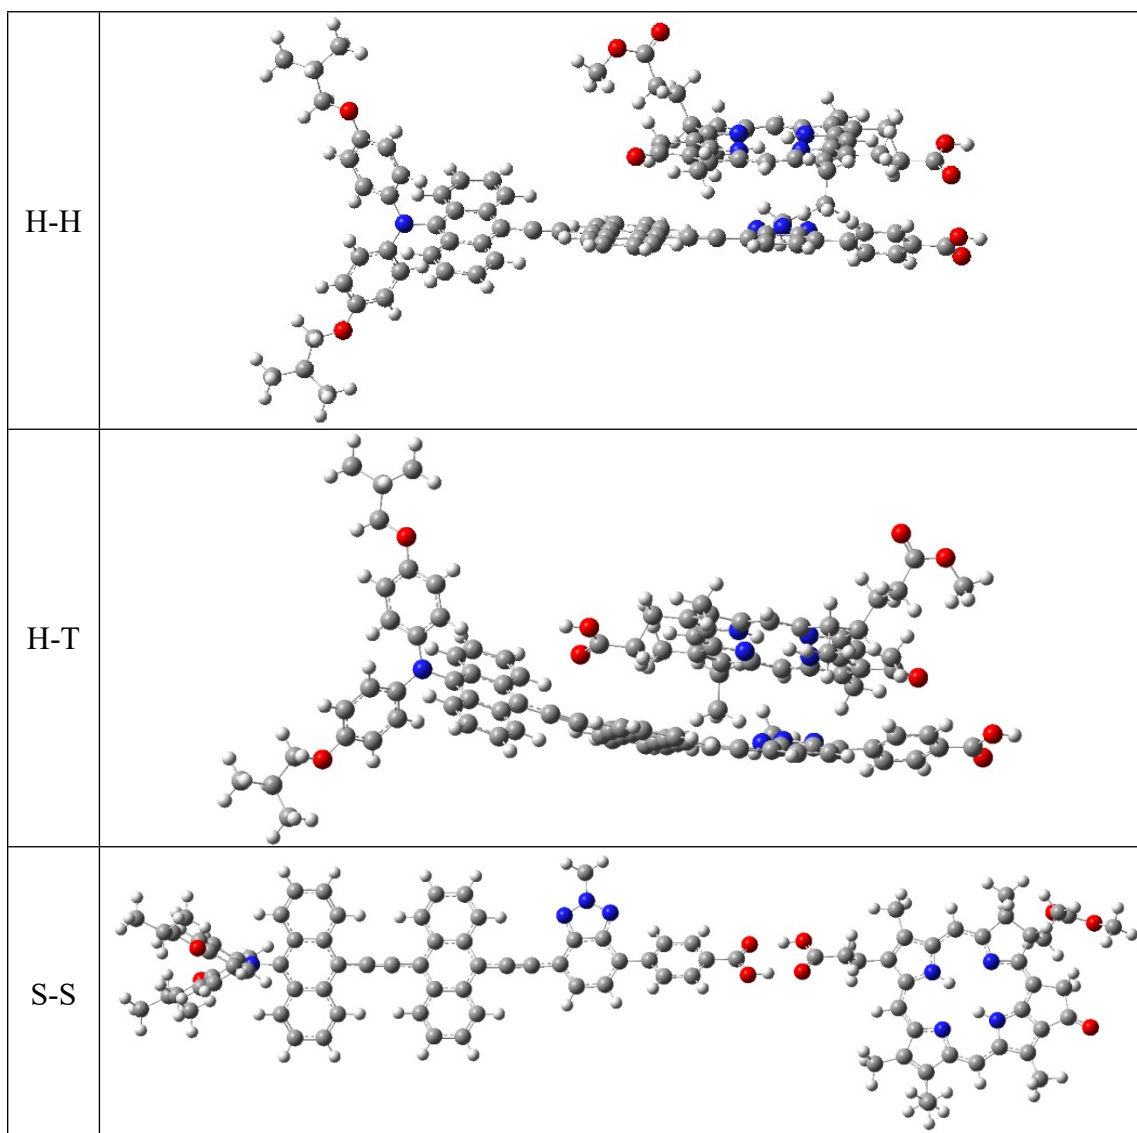

**Figure S2.** The head-to-head (H-H), head-to-toe (H-T) and side-by-side type (S-S) configuration of the co-sensitization system.

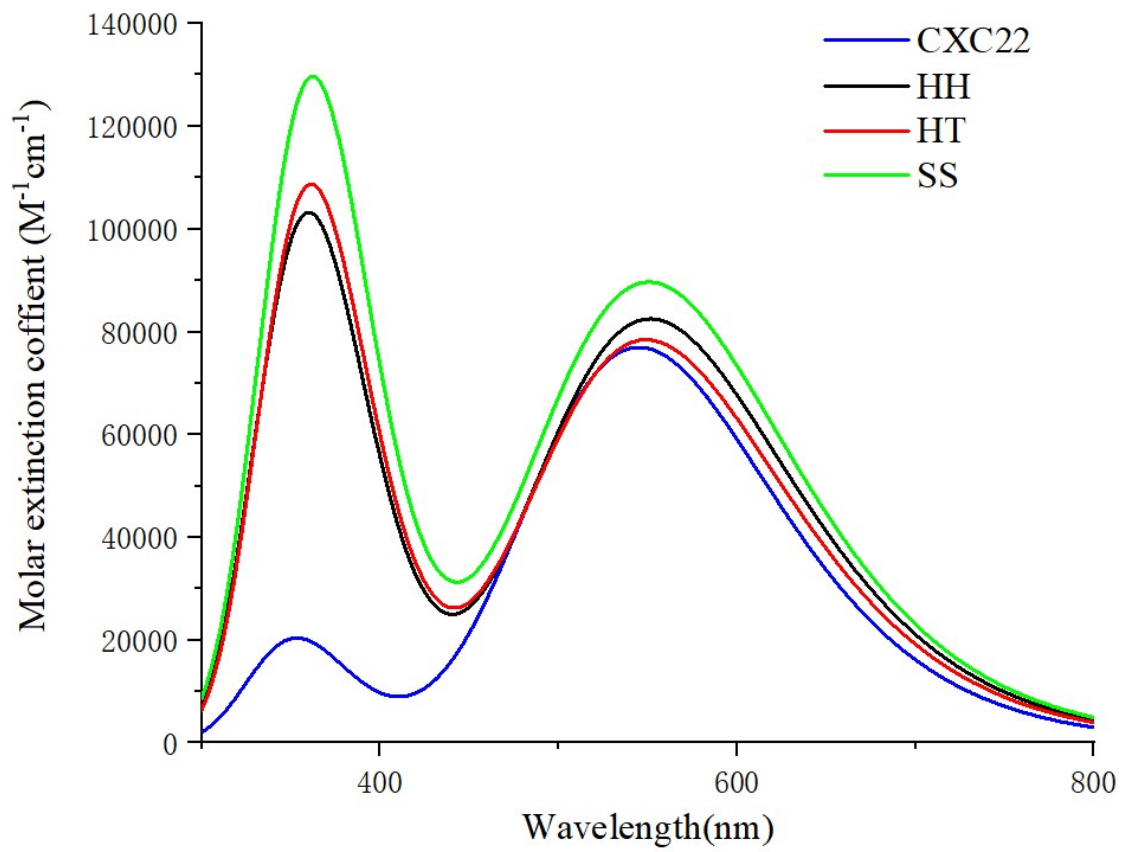

**Figure S3.** Absorption spectra of three co-sensitive configurations.

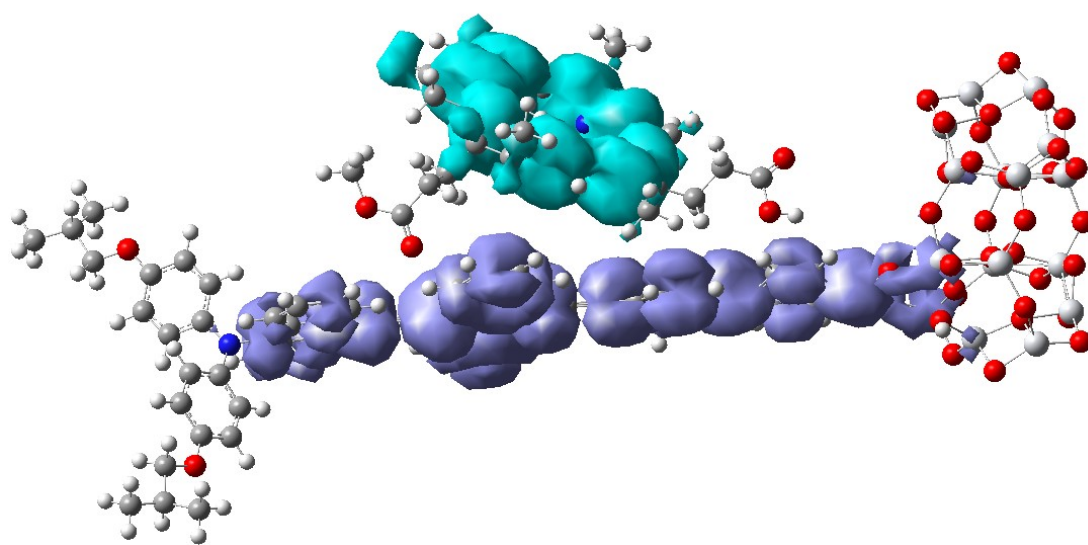

**Figure S4.** CDD diagram of dye co-sensitized adsorption on TiO<sub>2</sub>.
